# Supplementary material for: Catalytic dehydrofluorination of 1,1,1,2-tetrafluoroethane to synthesize trifluoroethylene over a modified NiO/Al2O3 catalyst
Source: Royal Society of Chemistry journal article supplement (doi:10.1039/c5cy00211g), 2015-01-01
Supplement: c5cy00211g1.pdf [file c5cy00211g1.pdf]

## Electronic supplementary information

### Catalytic dehydrofluorination of 1, 1, 1, 2-tetrafluoroethane to synthesize trifluoroethylene over the modified NiO/Al<sub>2</sub>O<sub>3</sub> catalyst

Wenzhi Jia, Min Liu, Xuewei Lang, Chao Hu, Junhui Li and Zhirong Zhu\*

*Department of Chemistry, Tongji University, Shanghai 200092, China.*

E-mail: zhuzhirong@tongji.edu.cn

#### Experimental Section

##### 1. Catalyst preparation

The MO<sub>x</sub>/Al<sub>2</sub>O<sub>3</sub> catalysts were prepared by a wetness incipient impregnation in aqueous solution of metal nitrate (Ce(NO<sub>3</sub>)<sub>3</sub> · 6H<sub>2</sub>O, Mg(NO<sub>3</sub>)<sub>2</sub> · 6H<sub>2</sub>O, Ca(NO<sub>3</sub>)<sub>2</sub> · 4H<sub>2</sub>O, Sr(NO<sub>3</sub>)<sub>3</sub>, La(NO<sub>3</sub>)<sub>3</sub> · 6H<sub>2</sub>O, Cr(NO<sub>3</sub>)<sub>3</sub> · 9H<sub>2</sub>O, Fe(NO<sub>3</sub>)<sub>3</sub> · 9H<sub>2</sub>O, Ni(NO<sub>3</sub>)<sub>3</sub> · 6H<sub>2</sub>O, Pd(NO<sub>3</sub>)<sub>2</sub> · 2H<sub>2</sub>O, KNO<sub>3</sub>, NaNO<sub>3</sub>). For instance, commercial  $\gamma$ -Al<sub>2</sub>O<sub>3</sub> (A. R., Sinopharm Chemical Reagent Co., Ltd) impregnated solution of Ni(NO<sub>3</sub>)<sub>2</sub> · 9H<sub>2</sub>O (A. R., Aldrich) was dried at 100 °C for 12h and calcined at 500 °C for 3 h in air. The calcined NiO/Al<sub>2</sub>O<sub>3</sub> catalyst was activated at 260 °C for 1 h and subsequently at 400 °C for 3 h, under the mixture gas of HF and N<sub>2</sub> (the molar ratio of N<sub>2</sub>/HF = 1, total flow rate = 40 ml min<sup>-1</sup>). The calcined samples were denoted as NiAlO-x catalyst, and x indicates the NiO weight content. The prefluorinated NiAlO-x catalyst was denoted as NiAlF-x catalyst.

##### 2. Characterization

X-ray diffraction (XRD) patterns were collected on a Focus D8 powder diffractometer operating at 40 kV and 30 mA with a Cu K $\alpha$  X-ray radiation source ( $\lambda$

= 0.154056 nm), in the  $2\theta$  range from 10 to  $80^\circ$  with a scan rate of  $0.2^\circ \text{ min}^{-1}$ . BET results were determined by  $\text{N}_2$  sorption isotherms at 77 K on an NOVA 2200e, and the samples were degassed at  $200^\circ \text{C}$  and  $2 \times 10^{-5}$  mbar for 12h. SEM (HitachiS-4700) with an EDX attachment (Zeiss Supra55) was taken on a Hitachi S-4800, the catalyst power was directly imbedded in conductive tapes, with the acceleration voltage of 20 kV.

$\text{NH}_3$ -TPD was conducted using a set of automatic Altamira-100 apparatus. The preheated ( $500^\circ \text{C}$ ) solid was absorbed with ammonia at  $100^\circ \text{C}$ . After the sample was purged with nitrogen ( $30 \text{ ml min}^{-1}$ , 30 min), the temperature was raised with  $10^\circ \text{C min}^{-1}$  up to  $600^\circ \text{C}$  while the desorbed ammonia was recorded continuously via a TCD detector. FT-IR spectra were obtained with a Perkin-Elmer 2000 FT-IR equipment and a self-supported wafer of sample (ca.40 mg). Samples were pretreated at  $400^\circ \text{C}$  for 2 h under vacuum, and followed by adsorption of purified pyridine (Aldrich, 99+ % grade) vapor at room temperature for 20 min. The system was then degassed and evacuated at  $100^\circ \text{C}$  under a high vacuum, and the IR spectrum on a self-supported wafer of sample was also recorded in the spectral range  $1800\text{--}1400 \text{ cm}^{-1}$  with 64 scans and at a resolution of  $4 \text{ cm}^{-1}$ .

Raman spectra were collected on a Renishaw RM1000 confocal microscope with exciting wavelength of 514.5 nm under ambient conditions. TG experiments were performed under the air atmosphere using a Netzsch STA 449C instrument, with a heating rate of  $1^\circ \text{C min}^{-1}$ .

### 3. *Dehydrofluorination of $\text{CF}_3\text{CFH}_2$*

The dehydrofluorination of  $\text{CF}_3\text{CFH}_2$  was carried out in a fixed bed reactor. 1.0 g of catalyst was used for the reaction. The molar ratio of  $\text{N}_2/\text{CF}_3\text{CFH}_2$  was 10 in a total flow rate of  $22.5 \text{ ml min}^{-1}$ . To remove the product HF, the reaction effluent passed an

aqueous KOH solution, then, it was analyzed by a gas chromatograph (HP-5890) using a HP-PLOT/ $\text{Al}_2\text{O}_3$  column (0.53 mm  $\times$  50 m) and FID detector.

### Supporting Figures and Tables

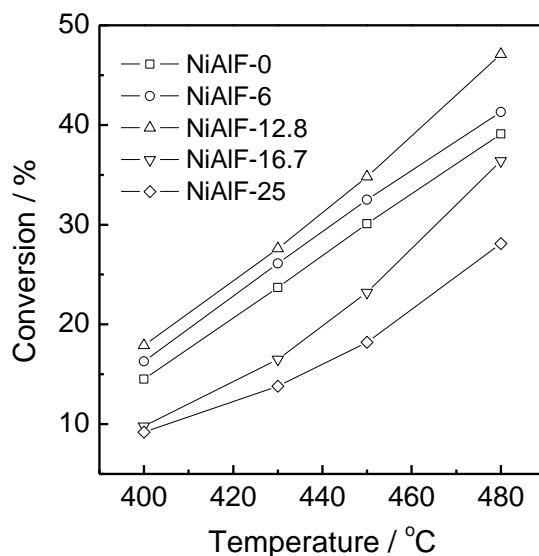

Fig. S1 Activity of NiAlF catalysts,  $\text{N}_2/\text{CF}_3\text{CFH}_2=10$ ,  $P=1$  atm, catalyst: 1.0 g.

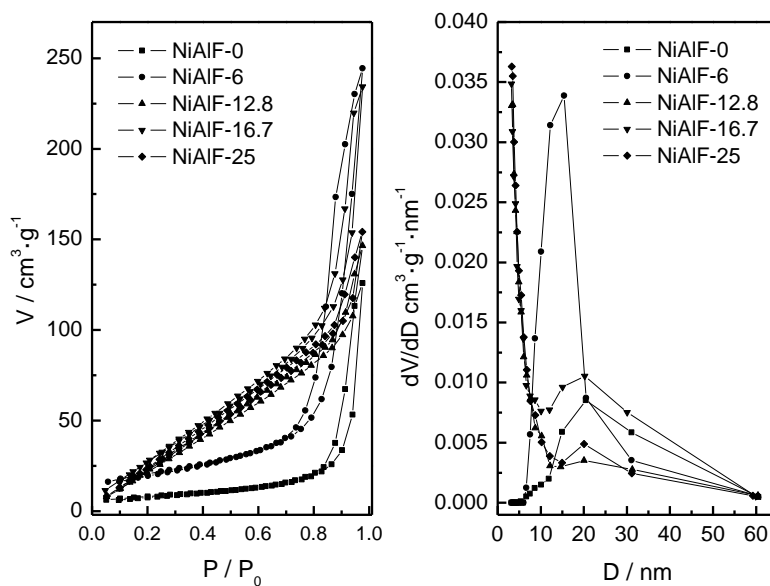

Fig. S2  $\text{N}_2$  adsorption isotherms (a) and pore diameters (b) of the NiAlF catalysts.

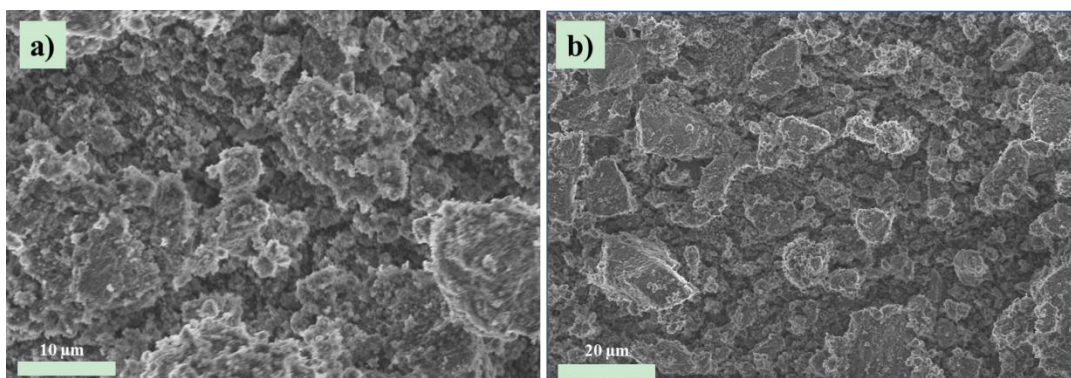

Fig. S3 SEM images of catalysts. SEM: a) NiAlO-12.8 and b) NiAlF-12.8 catalyst.

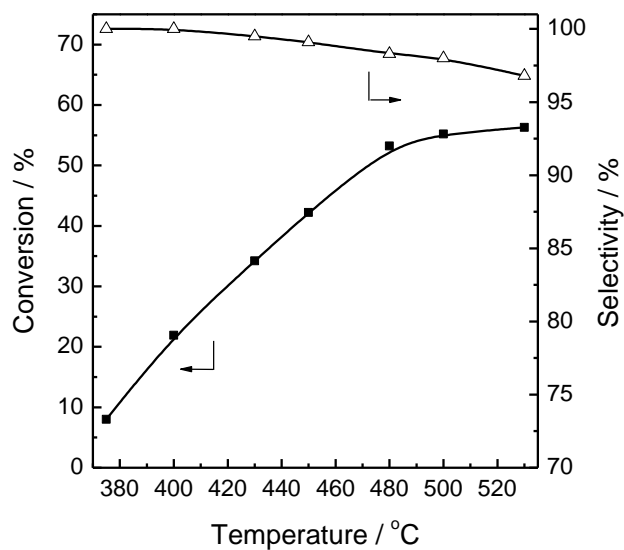

Fig. S4 Influence of temperature on the catalytic performance.  $N_2/HFC-134a=10$ ,  
 $GHSV = 675 h^{-1}$ .

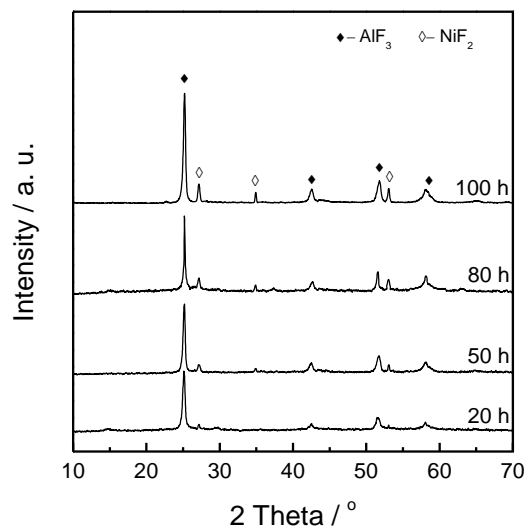

Fig. S5 XRD patterns of NiAlF-5 catalyst after different reaction time.

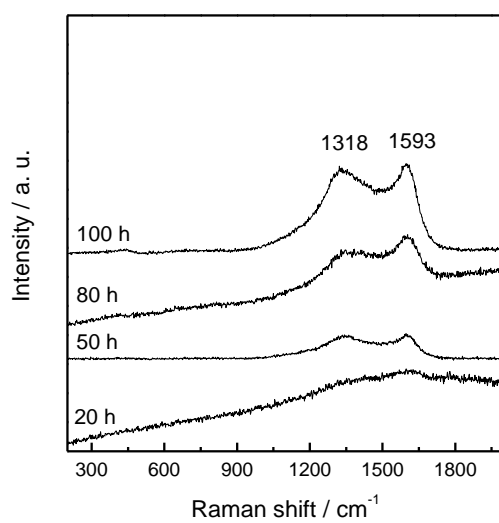

Fig. S6 Raman spectra of NiAlF-12.8 catalyst after different reaction time.

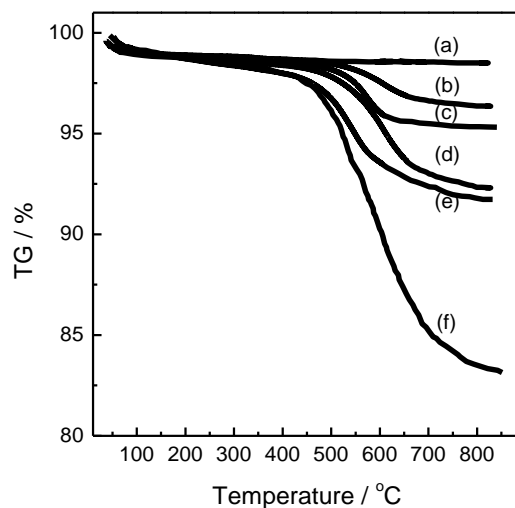

Fig. S7 TG curves of NiAlF catalyst. (a) fresh catalyst, (b) 20 h, (c) 50 h, (d) 80 h, (e) 100 h, (f) deactivated catalyst.

Table S1 Catalytic reactivity of the catalyst before and after regeneration

| Catalyst           | Conversion / % | Selectivity / % | Yield / % |
|--------------------|----------------|-----------------|-----------|
| Fresh              | 28.1           | 99.9            | 28.0      |
| Deactivated        | 8.4            | 99.6            | 8.3       |
| After regeneration | 26.5           | 99.8            | 26.4      |

Table S2 Physical properties of the NiAlO and NiAlF catalysts.

| Catalysts  | $S_{\text{BET}}$<br>/ $\text{m}^2 \text{g}^{-1}$ | Volume<br>/ $\text{cm}^3 \text{g}^{-1}$ | Average poresize<br>/ nm | Total acidic amount<br>/ $\text{mmol g}^{-1}$ |
|------------|--------------------------------------------------|-----------------------------------------|--------------------------|-----------------------------------------------|
| NiAlF-0    | 27.925                                           | 0.195                                   | 19                       | 0.326                                         |
| NiAlF-6.0  | 72.534                                           | 0.378                                   | 20                       | 0.307                                         |
| NiAlF-12.8 | 130.945                                          | 0.227                                   | 3-20                     | 0.388                                         |
| NiAlF-16.7 | 139.345                                          | 0.363                                   | 3-20                     | 0.206                                         |
| NiAlF-25.0 | 134.628                                          | 0.239                                   | 3-20                     | 0.128                                         |
| NiAlO-12.8 | 314.212                                          | 0.558                                   | 10                       | n/a                                           |
